# Supplementary material
Source: PubMed Central journal article supplement (PMC4304728)
Supplement: embr0016-0044-sd1.pdf [file embr0016-0044-sd1.pdf]

## Supplementary Information Liu et al:

### Supplementary Table S1: Gene expression studies in human DS cells and tissues

| ArrayExpress accession ID | GEO accession ID | Tissue                                  | Number of samples | Array design ID     | Reference               |
|---------------------------|------------------|-----------------------------------------|-------------------|---------------------|-------------------------|
| E-GEOD-47014              | GSE47014         | iPS cell line                           | 27                | A-GEOD-15207        | Jiang et al, 2013       |
| E-MTAB-1238               | NA               | lymphoblasts                            | 12                | A-AFFY-44           | Granese et al, 2013     |
| E-GEOD-38931              | GSE38931         | iPSC from fb                            | 8                 | A-GEOD-10558        | Li et al, 2012          |
| E-GEOD-10758              | GSE10758         | amniotic fluid                          | 20                | A-AGIL-9            | Chou et al, 2008        |
| E-GEOD-16176              | GSE16176         | amniotic fluid                          | 14                | A-AFFY-44           | Slonim et al, 2009      |
| E-GEOD-48051              | GSE48051         | amniotic fluid                          | 38                | A-AGIL-28           | Volk et al, 2013        |
| E-GEOD-6283               | GSE6283          | amniotic fluid                          | 21                | A-AFFY-44           | Altug-Teber et al, 2007 |
| E-GEOD-35665              | GSE35665         | PBC, PBMC                               | 37                | A-AFFY-143          | Li et al, 2012          |
| E-GEOD-35561              | GSE35561         | CD41+/235+ iPSC-derived progenitor      | 6                 | A-AFFY-141          | Chou et al, 2012        |
| E-GEOD-20910              | GSE20910         | DS-ALL-BM                               | 49                | A-AFFY-44           | Loudin et al, 2011      |
| E-GEOD-17459              | GSE17459         | DS-ALL-WBC                              | 119               | A-AFFY-33/A-AFFY-44 | Hertzberg et al, 2010   |
| E-GEOD-16677              | GSE16677         | DS-AMKL-BM, PBC                         | 18                | A-AFFY-44           | Klusmann et al, 2010a   |
| E-GEOD-4119               | GSE4119          | DS-AMKL-BM, PBMC                        | 80                | A-AFFY-33           | Bourquin et al, 2006    |
| E-MEXP-72                 | NA               | DS-AMKL-, TAM-PBMC                      | 20                | A-AFFY-33           | McElwaine et al, 2004   |
| E-GEOD-32388              | GSE32388         | CMK cell line                           | 4                 | A-AGIL-28           | Xavier et al, 2011      |
| E-GEOD-56332              | GSE56332         | <i>Note 1</i>                           | 9                 | A-AGIL-28           | Maroz et al, 2014       |
| E-GEOD-1789               | GSE1789          | heart                                   | 15                | A-AFFY-33           | Conti et al, 2007       |
| E-GEOD-1397               | GSE1397          | heart, astrocyte, cerebrum, cerebellum. | 28                | A-AFFY-33           | Mao et al, 2005         |
| E-GEOD-42956              | GSE42956         | fb and fb-derived iPSC.                 | 54                | A-GEOD-10558        | Briggs et al, 2013 *    |
| E-GEOD-42772              | GSE42772         | astrocyte                               | 16                | A-MEXP-931          | Helguera et al, 2013    |
| E-GEOD-5390               | GSE5390          | brain                                   | 15                | A-AFFY-33           | Lockstone et al, 2007 * |
| E-GEOD-48611              | GSE48611         | iPSC, neuron from iPSC                  | 18                | A-AFFY-44           | Weick et al, 2013 *     |
| E-GEOD-52249              | GSE52249         | iPSC                                    | 7                 | A-GEOD-11154        | Hibaoui et al, 2014     |

|                 |          |                              |    |              |                        |
|-----------------|----------|------------------------------|----|--------------|------------------------|
| E-GEOD-55504    | GSE55504 | iPSC                         | 30 | A-GEOD-11154 | Letourneau et al, 2014 |
| E-GEOD-42142    | GSE42142 | 2 <sup>nd</sup> tri placenta | 9  | A-GEOD-10999 | Jin et al, 2013        |
| EGAS00001000546 |          | TAM, DS-AMKL BM, PB          | 66 | A-GEOD-11154 | Yoshida et al, 2013    |

**Note 1:** normal CD34+ HSPC lentivirally transduced to ectopically express Gata1s or Gata1.

\* Datasets were used in differential expression analysis across T21 tissues (Figure 3).

### Abbreviations:

fb - fibroblast; PBC – peripheral blood cell; PBMC – peripheral blood mononuclear cell; BM – bone marrow  
WBC – white blood cell; TAM/TMD – transient abnormal myelopoiesis/transient myeloproliferative disorder ; DS-ALL – Down-syndrome acute lymphoblastic leukemia; DS-AMKL – Down-syndrome acute megakaryocyte leukemia (also known as ML-DS)

A keywords search performed on databases ArrayExpress, Gene Expression Omnibus (GEO) and European Genome-phenome Archive (EGA) was used to extract human GEP datasets from public repositories. Keywords included “trisomy 21”, “Down syndrome”, “Downs syndrome” and “iAMP”. Gene expression profiles include those obtained by microarray or RNA-seq experiments. Differential expression analysis was performed using the *limma* algorithm. Studies with small sample numbers and leukemia were excluded. Therefore, datasets investigated were: adult DS brain, DS neurons differentiated from iPSCs and DS fibroblast. An FDR cutoff of 0.15 was used. These data were compared with unpublished *Affymetrix HuEX\_1-0\_st array* data from our lab of trisomy 21 human second trimester fetal liver CD34+ cells (n=4) compared with normal (disomic) second trimester fetal liver CD34+ cells (n=3). These data were analysed as follows:

Preprocessing: Expression measurement – antigenomic background correction, quantile normalization, and RMA summarization at natural scale using *xps v1.22*.

Filtering: Based on the design of the exon array probe sets on Affymetrix Exon HT array are grouped into “core”, “extended” and “full”. Several filtering steps were applied at the probe set and transcript levels prior to analysis:

- Restrict analysis to core probe sets;
- Remove probe sets with low detection above background call (DABG) with  $p \text{ value} \geq 0.05$ ;
- Remove cross-hybridisation probes;
- Remove transcripts that are not detected in either sample group.

Differential expression analysis was carried out using 2-sample student t-test integrated in *genefilter* and a linear model method, *limma v3.18.13*.
